# Supplementary material
Source: MDPI journal article supplement (https://www.mdpi.com/1424-8247/17/4/419)
Supplement: s1 [file s1]

**Supplementary Figures S1-S3** Superimposed images of our EHLA complexes with HLA molecules from the RCSB Protein Data Bank.

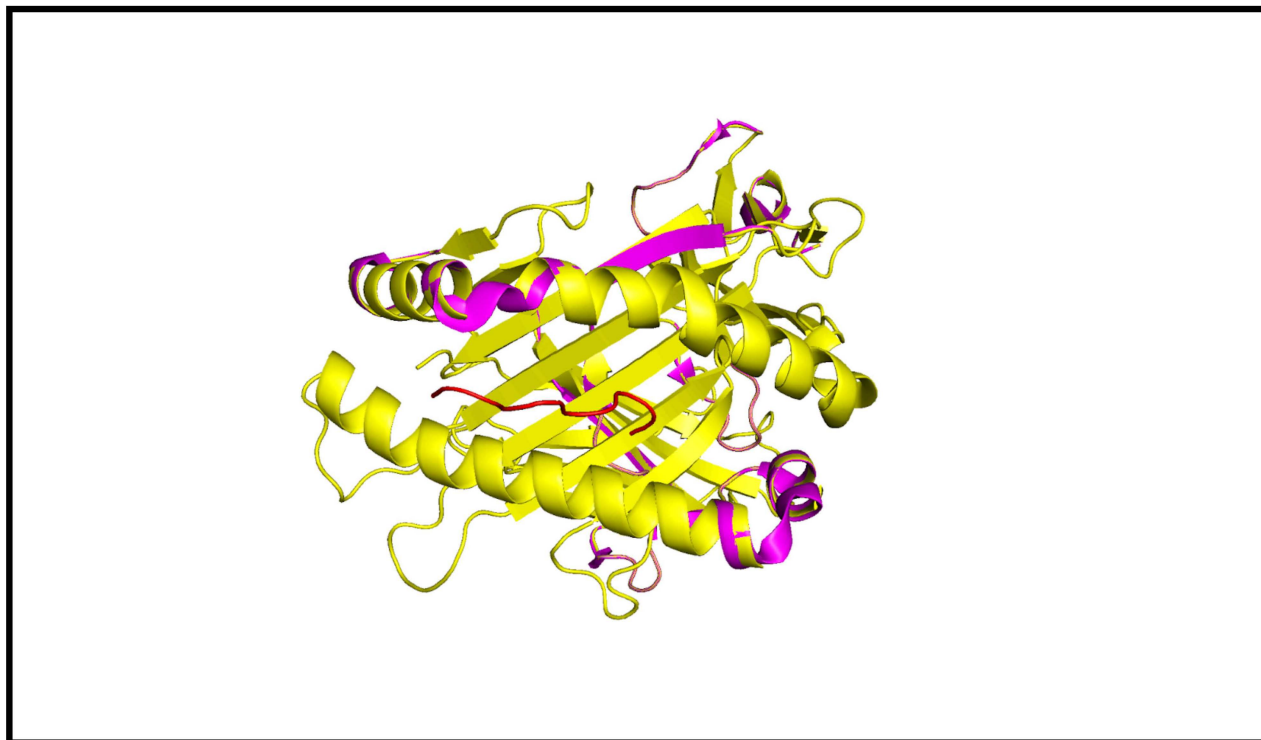

**Supplementary Figure S1.** VVMGENNTLV glioblastoma multiforme epitope binding to MHC Class I molecule HLA-A\*02:06 superimposed with PDB ID: 3OXR (A).

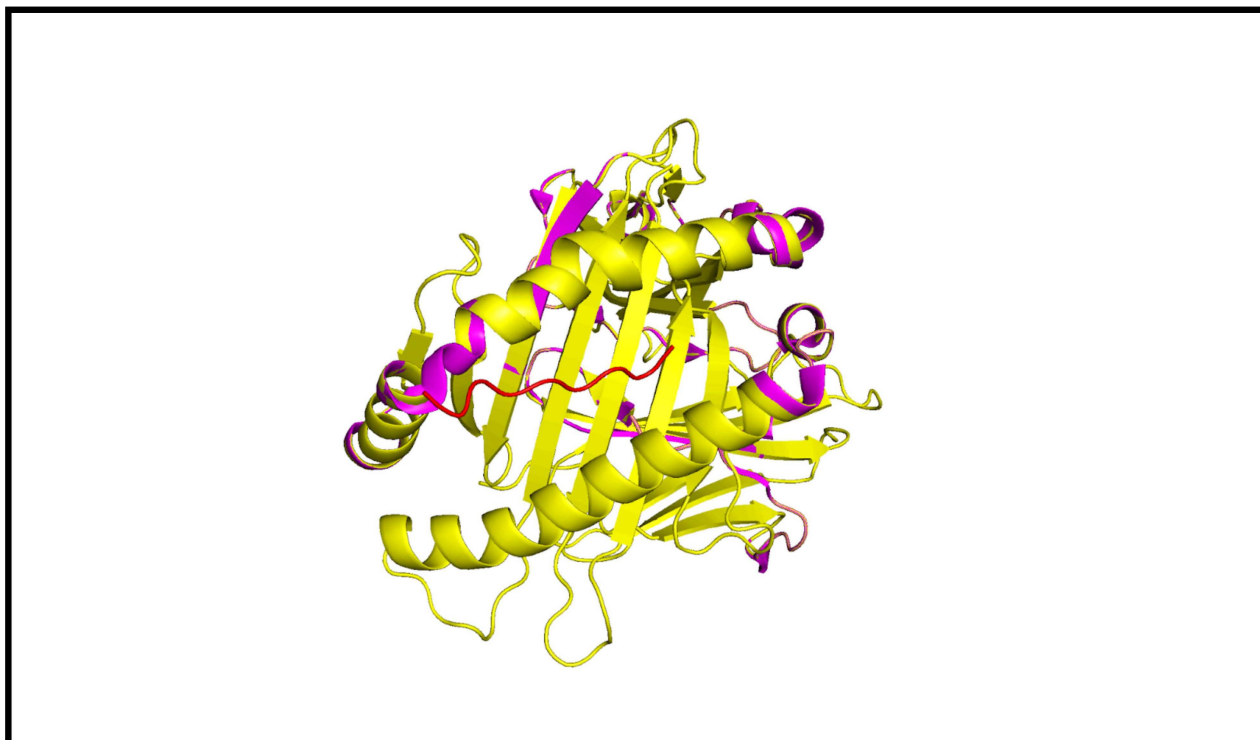

**Supplementary Figure S2.** ILKETELKK head and neck squamous cell carcinoma epitope binding to MHC Class I molecule HLA-A\*03:01 superimposed with PDB ID: 7L1C, A chain.

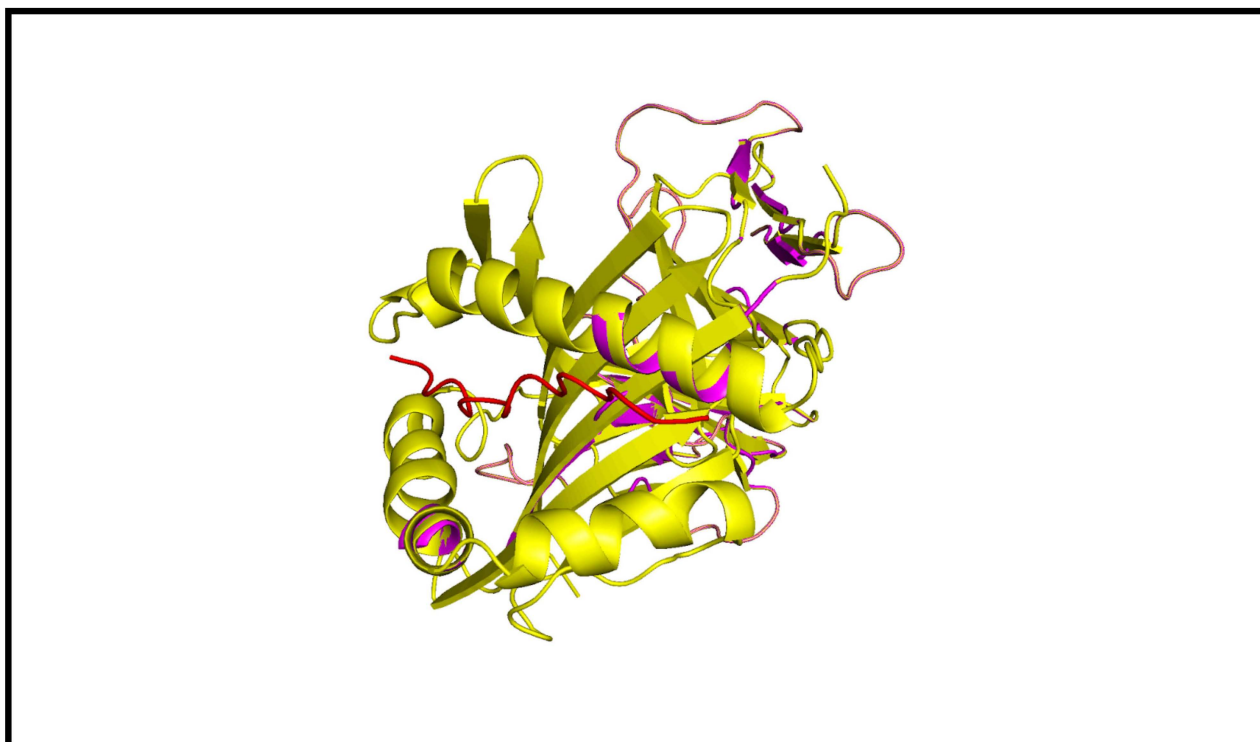

**Supplementary Figure S3.** ILKKTEFKKIKVLGS colorectal adenocarcinoma epitope binding to MHC Class II molecule HLA-DRB1\*04:01 superimposed to PDB: 5JLZ.

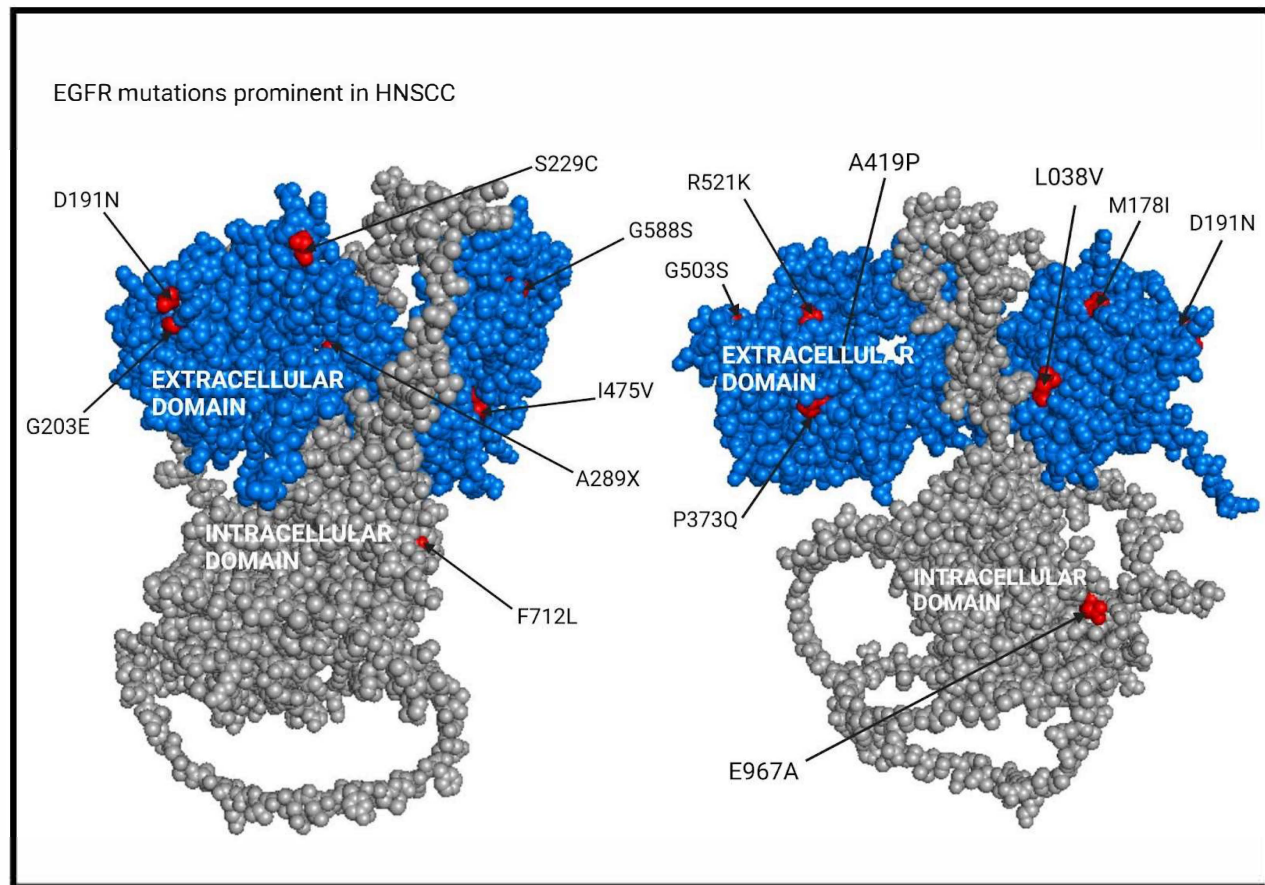

**Supplementary Figure S4.** EGFR modeling of mutations prominent in HNSCC. Created with <https://biorender.com>.

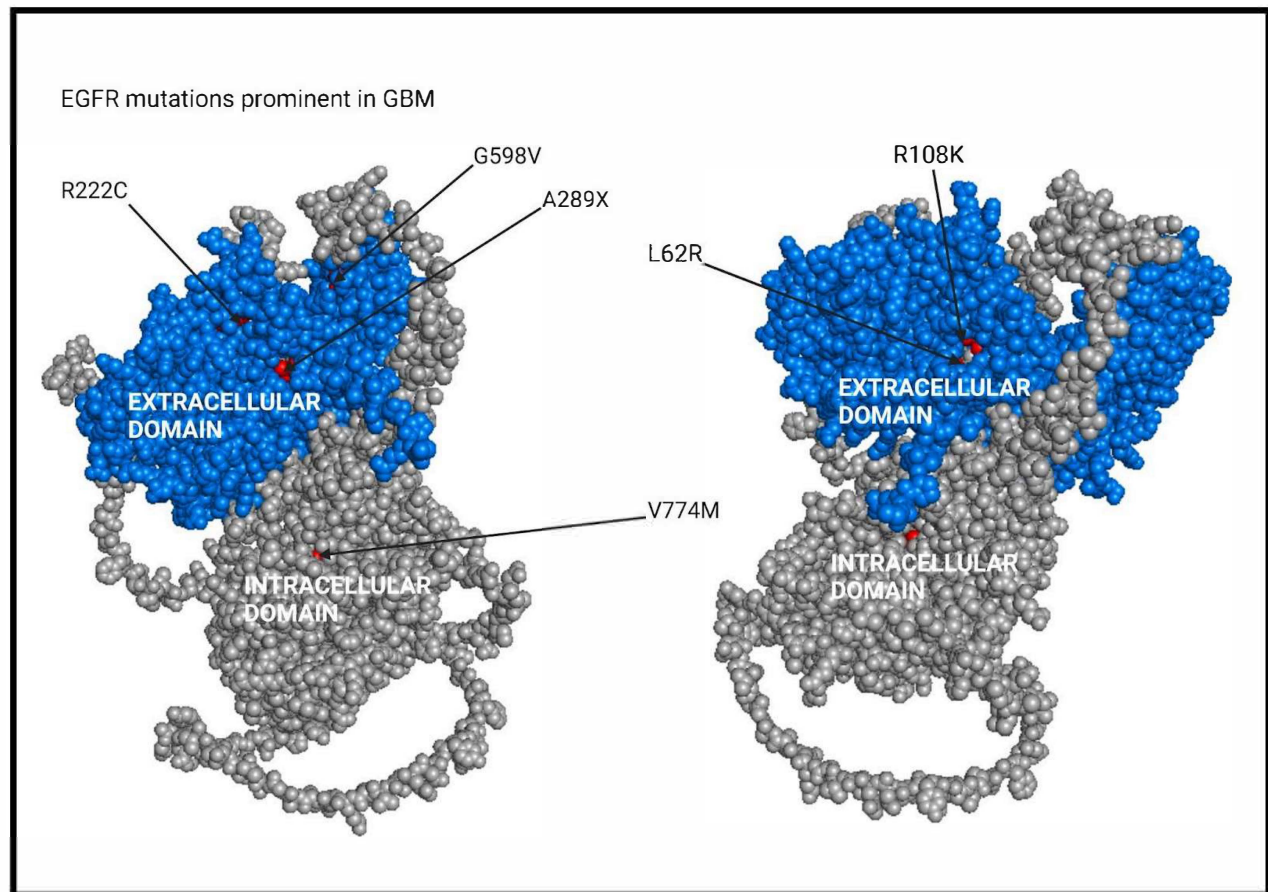

**Supplementary Figure S5.** EGFR modeling of mutations prominent in GBM. Created with <https://biorender.com>.

# EGFR mutations prominent in CRAD

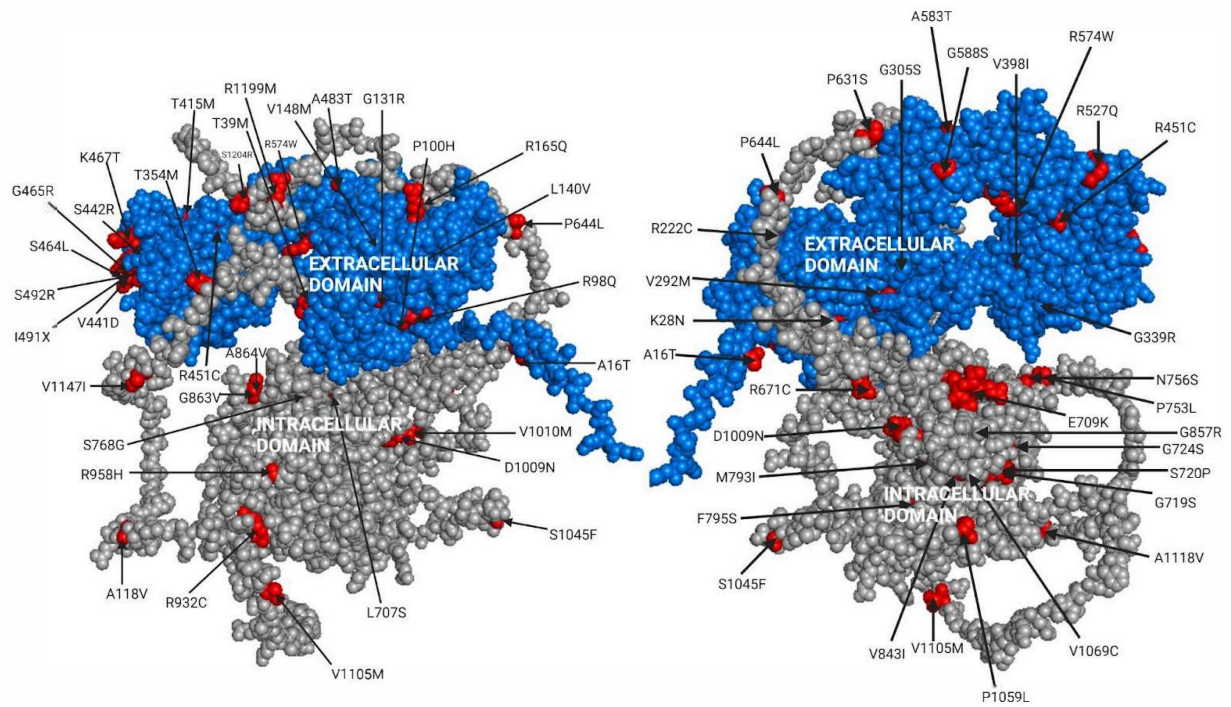

**Supplementary Figure S6.** EGFR modeling of mutations prominent in CRAD. Created with <https://biorender.com>.
